# Supplementary figures and images for: The Effect of a New N-hetero Cycle Derivative on Behavior and Inflammation against the Background of Ischemic Stroke
Source: MDPI journal article supplement (doi:10.3390/molecules27175488), 2022-08-26

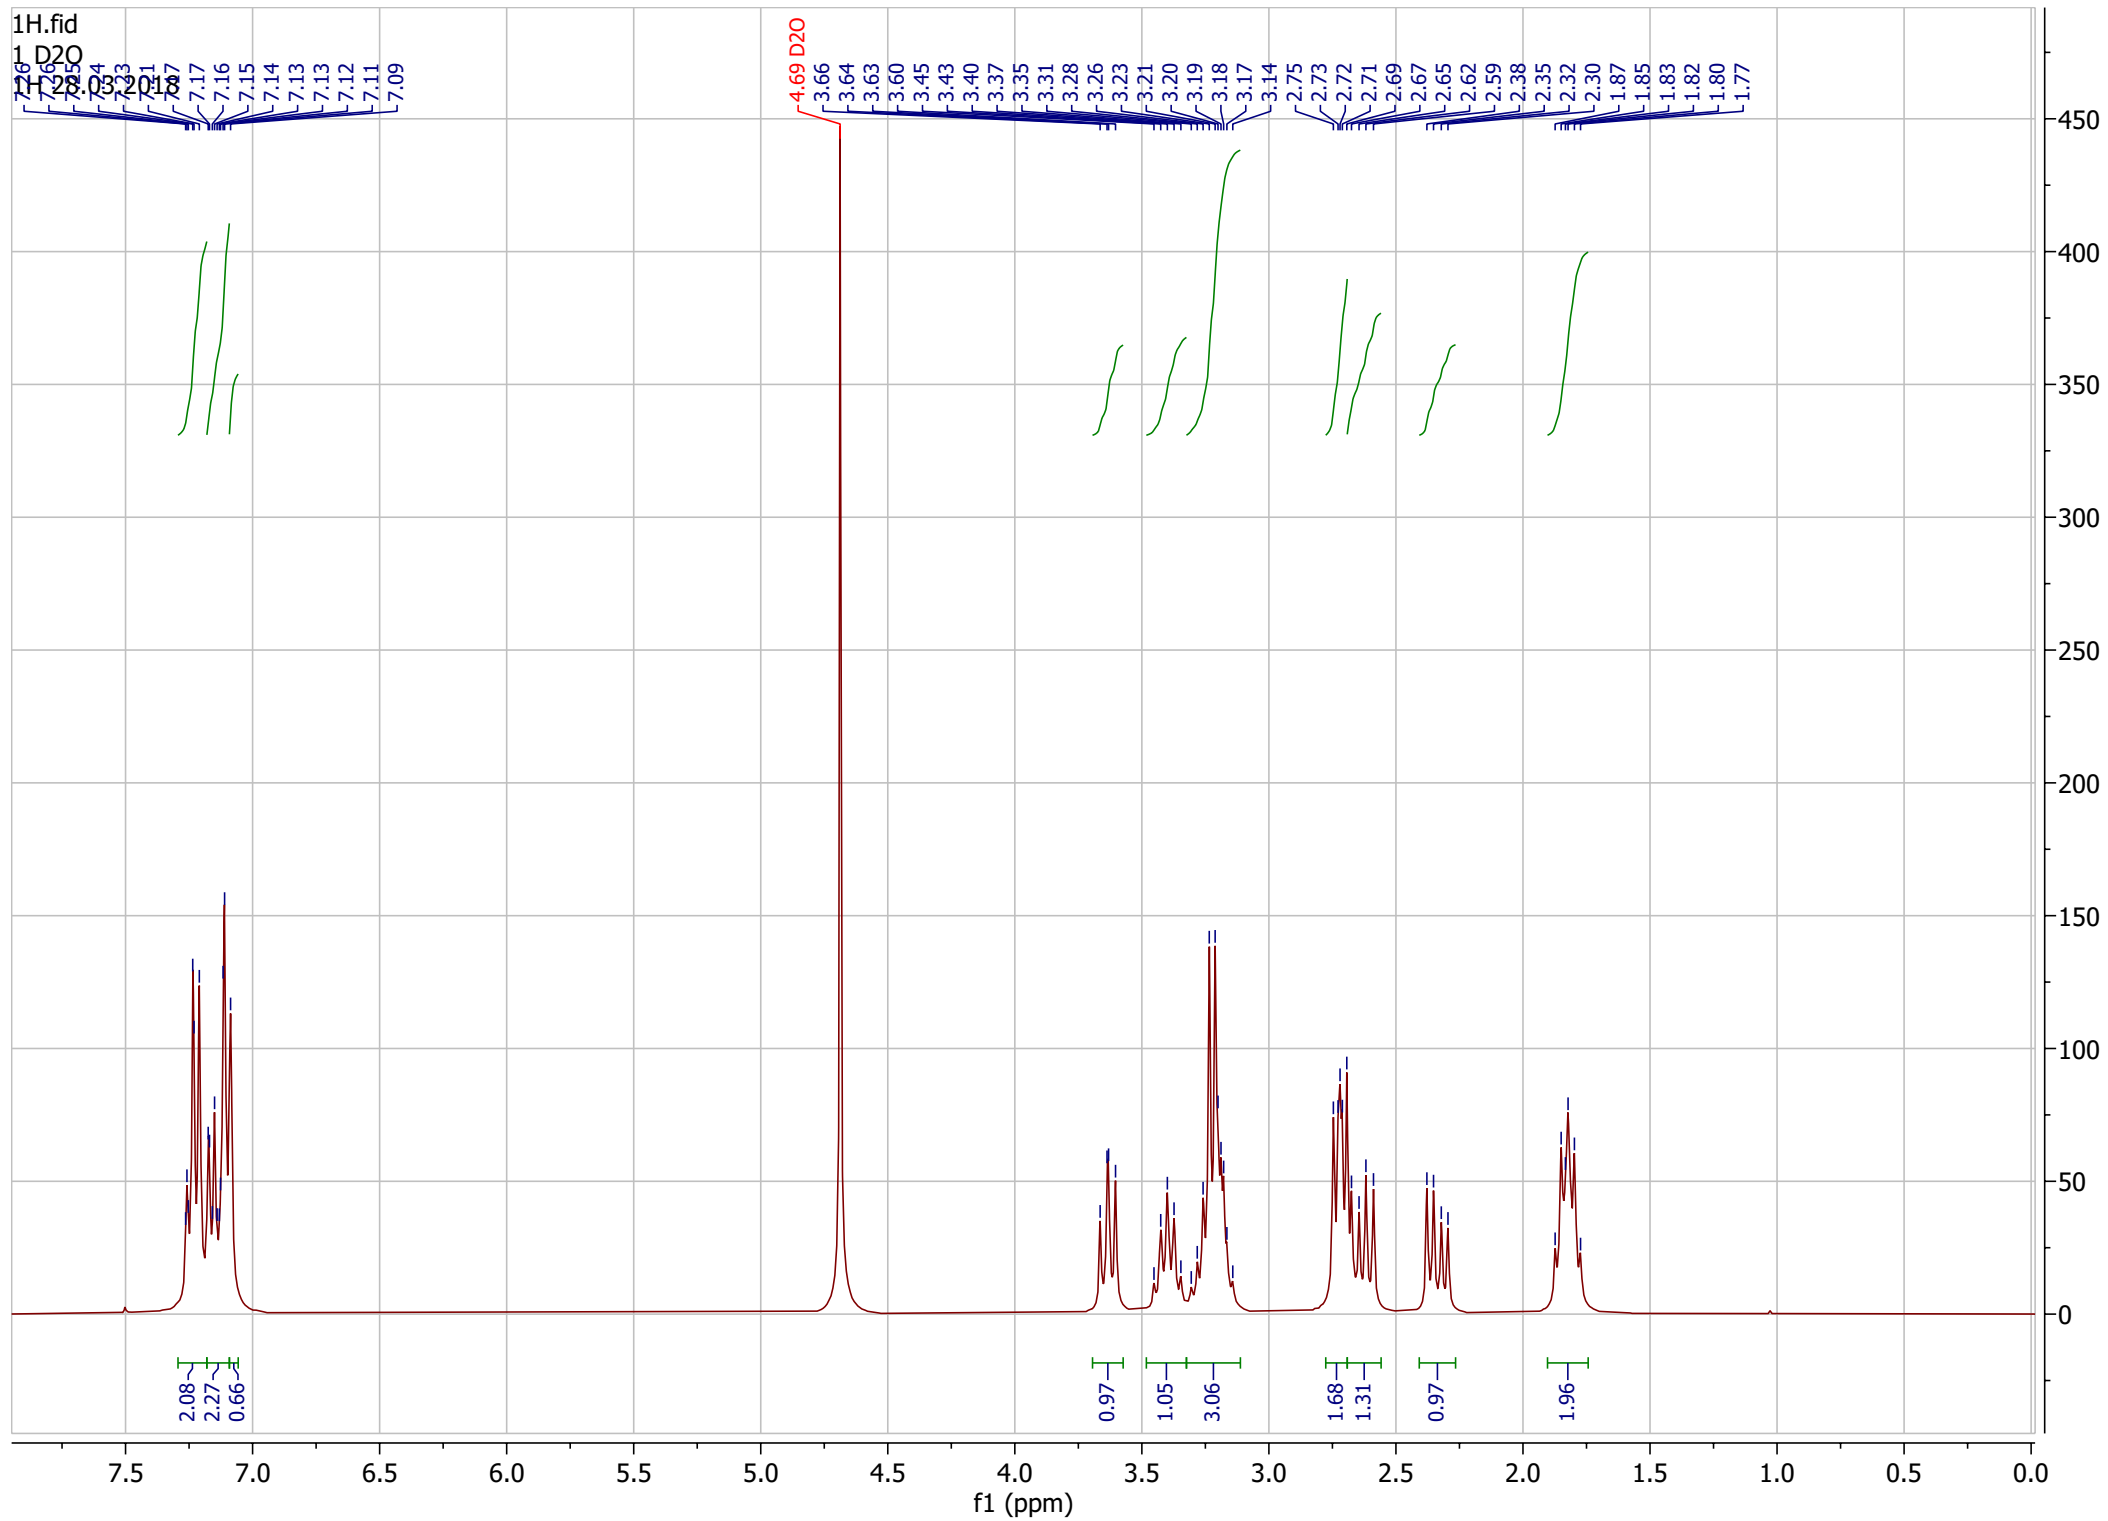

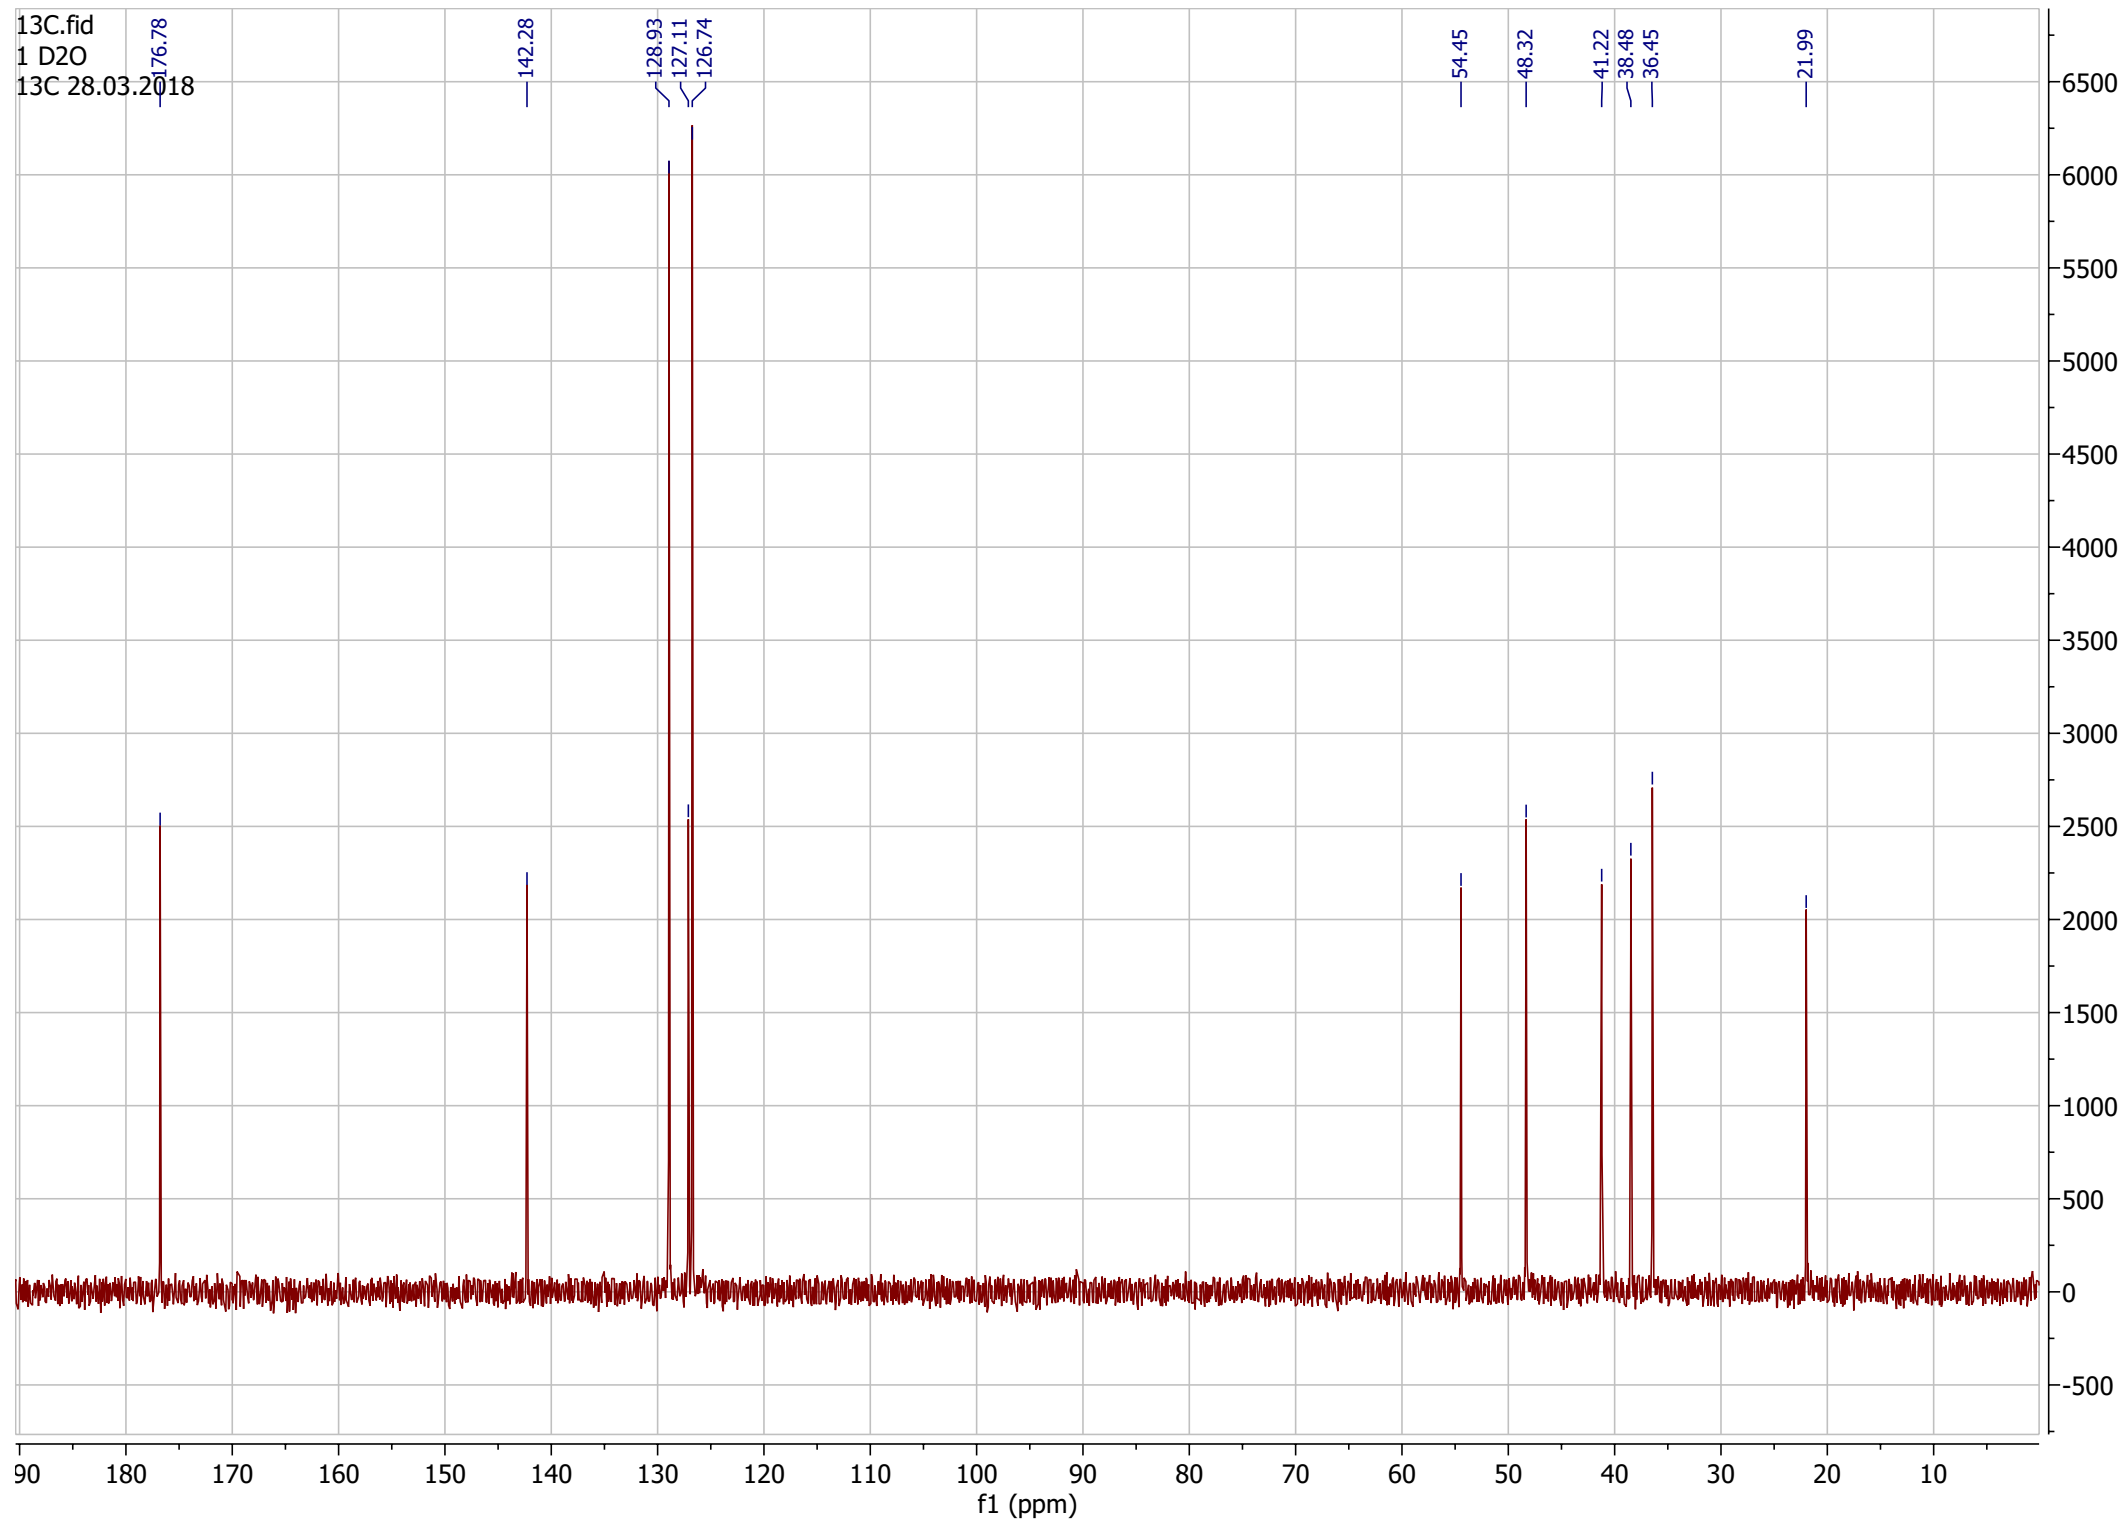

Supplement: s1 [file s1]
